# Supplementary material for: Collaborative care model versus usual care for the management of musculoskeletal and co-existing mental health conditions: a randomised feasibility mixed-methods study
Source: HighWire-hosted journal article supplement (doi:10.1136/bmjopen-2023-079707), 2024-02-01
Supplement: bmjopen-2023-079707supp002_data_supplement.pdf [file bmjopen-2023-079707supp002_data_supplement.pdf]

- I. What factors influenced your decision to take part in the trial?
- II. Tell me about your experience during the trial?
- III. Tell me about your experience with the support you received from the case manager. (Only for participants under the intervention arm)
- IV. How was your experience in navigating through the support of the collaborative care model/ support from different professionals at the same time? (Only for participants under the intervention arm). Do you think that this type of support was helpful to you? What could be improved? (Only for participants under the intervention arm)
- V. What aspects of the trial went well?
- VI. What aspects of the trial could be better or should be changed?
- VII. What do you think about the number of follow-ups provided by the case manager? (Only for participants under the intervention arm)
- VIII. Did you have any referral to have psychological or psychiatric support during the trial?
- IX. (if applicable) Was the psychological/ psychiatric support sufficient? Did it meet your needs and expectations? Would you have preferred some other form of support? (Rephrase this question according to the type of support that participants get through the trial)
- X. (if applicable) What helped you to attend appointments booked for you? What prevented you from attending appointments booked for you? (Rephrase in case the levels of adherence of the participant were low during the trial e.g. What prevented you from carrying out these appointments?)
- XI. Do you think this type of intervention was useful? Why? (Only for participants under the intervention arm)
- XII. What are your feelings about being randomised for the usual care?
- XIII. What were the advantages of taking part in the trial?
- XIV. What were the disadvantages of taking part in the trial?
- XV. Other thoughts about the trial?
- XVI. Any other comments?
